# Supplementary material for: The detection of 3 ambiguous type 2 vaccine-derived polioviruses (VDPV2s) in Uganda
Source: Springer Nature journal article supplement (doi:10.1186/s12985-018-0990-y), 2018-04-27
Supplement: MOESM3 [file 15725578]

**Paper: The detection of 3 ambiguous type 2 vaccine-derived polioviruses (VDPVs) in Uganda**

I, Bakamutumaho Barnabas agree to the content of the above paper. I further agree for the article to be licensed under the Creative Commons Attribution License 4.0



21<sup>st</sup> December 2017

Signature and date

**Paper: The detection of 3 ambiguous type 2 vaccine-derived polioviruses (VDPVs) in Uganda**

I, Annet Kisakye agree to the content of the above paper. I further agree for the article to be licensed under the Creative Commons Attribution License 4.0

Annet Kisakye p-p 04/Jan/18

Signature and date

Subject: Re: RE: RE: Fw: 'approval of content and publication method of the paper'

---

From: marybridgetnanteza@yahoo.com

To: kisakyea@who.int

Date: Friday, January 5, 2018, 10:44:22 AM GMT+3

---

OK thanks  
Bridget

On Thursday, January 4, 2018, 9:25:24 PM GMT+3, KISAKYE, Annet <kisakyea@who.int> wrote:

No problem, please go ahead and sign on my behalf. You may attach this email as proof of authorization.

Kind regards

---

**From:** Mary Bridget Nanteza [mailto:marybridgetnanteza@yahoo.com]  
**Sent:** Thursday, January 04, 2018 6:12 PM  
**To:** KISAKYE, Annet  
**Subject:** Re: RE: Fw: 'approval of content and publication method of the paper'

Dear Annet,

Thanks for the response

May I sign on your behalf!

Regards,  
Bridget

On Thursday, January 4, 2018, 9:58:55 AM GMT+3, KISAKYE, Annet <kisakyea@who.int> wrote:

Unfortunately I have no access to facilities now. I am currently on leave until 15 Jan

Sent from my Sony Xperia™ smartphone

--- Mary Bridget Nanteza wrote ---

Dear Annet,

Good morning,

Sorry you signed the old form. Please see the attached new one and approve. I am scheduled to submit today. I am sorry about the rash. Thank you.

Regards,  
Bridget

----- Forwarded Message -----

**From:** Mary Bridget Nanteza <[marybridgetnanteza@yahoo.com](mailto:marybridgetnanteza@yahoo.com)>

**To:** Annet KISAKYE <[kisakye@who.int](mailto:kisakye@who.int)>; Edson KATUSHABE <[katushabeed@who.int](mailto:katushabeed@who.int)>; Raffaella Williams <[raffaellaw28@gmail.com](mailto:raffaellaw28@gmail.com)>; Banarbas Bakamutumaho <[bbarnabas2001@yahoo.com](mailto:bbarnabas2001@yahoo.com)>; Hieronyma Nelisiwe GUMEDE-MOELETSI <[gumedemoeletsih@who.int](mailto:gumedemoeletsih@who.int)>

**Sent:** Thursday, December 21, 2017, 4:26:39 PM GMT+3

**Subject:** 'approval of content and publication method of the paper'

Dear All,

Please send your approval document. See attachments.

Regards,  
Bridget

**Paper: The detection of 3 ambiguous type 2 vaccine-derived polioviruses (VDPVs) in Uganda**

I, Prossy Namuwulya agree to the content of the above paper. I further agree for the article to be licensed under the Creative Commons Attribution License 4.0

Namuwulya P. 21/12/2017

Signature and date

**Paper: The detection of 3 ambiguous type 2 vaccine-derived polioviruses (VDPVs) in Uganda**

I, -----Henry Bukenya----- agree to the content of the above paper. I further agree for the article to be licensed under the Creative Commons Attribution License 4.0

-----  -----

Signature and date

**Paper: The detection of 3 ambiguous type 2 vaccine-derived polioviruses (VDPVs) in Uganda**

I, Dr. KATUSHABE EDSON agree to the content of the above paper. I further agree for the article to be licensed under the Creative Commons Attribution License 4.0

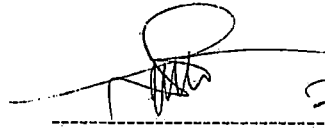 20/12/2017

Signature and date

**Paper: The detection of 3 ambiguous type 2 vaccine-derived polioviruses (VDPVs) in Uganda**

I, Josephine Bwogi agree to the content of the above paper. I further agree for the article to be licensed under the Creative Commons Attribution License 4.0

 12<sup>th</sup> Dec. 2017

-----  
Signature and date



**Paper: The detection of 3 ambiguous type 2 vaccine-derived polioviruses (VDPVs) in Uganda**

I, Dr. Charles R. Byabamazima, agree to the content of the above paper. I further agree for the article to be licensed under the Creative Commons Attribution License 4.0



18/ 12/ 2017

Signature and date

**Paper: The detection of 3 ambiguous type 2 vaccine-derived polioviruses (VDPVs) in Uganda**

I, Nicksy Gumede ----- agree to the content of the above paper. I further agree for the article to be licensed under the Creative Commons Attribution License 4.0

Nicksy Gumede 04/Jan/18

Signature and date

Subject: Re: approval

---

From: nicksymoeletsi@gmail.com

To: marybridgetnanteza@yahoo.com

Date: Thursday, January 4, 2018, 4:10:01 PM GMT+3

---

Many thanks Bridget.

Good luck.

Nicksy

Sent from my iPhone

On 04 Jan 2018, at 13:20, Mary Bridget Nanteza <[marybridgetnanteza@yahoo.com](mailto:marybridgetnanteza@yahoo.com)> wrote:

Dear Nicksy.

Okay i will sign on your behalf. Thank you

Happy holidays

Regards,  
Bridget

On Thursday, January 4, 2018, 1:00:34 PM GMT+3, Nicksy <[nicksymoeletsi@gmail.com](mailto:nicksymoeletsi@gmail.com)> wrote:

Do I need to submit any form? If so, kindly resubmit as I have no computer with me as currently abroad with the family for holidays.

Regards  
Nicksy

Sent from my iPhone

On 04 Jan 2018, at 8:21, Mary Bridget Nanteza <[marybridgetnanteza@yahoo.com](mailto:marybridgetnanteza@yahoo.com)> wrote:

Dear Nicksy,

Good morning

I got a waiver for the processing charge of our paper and i am scheduled to submit today. Please kindly send the approval preferably in the morning today. I am sorry about the rash. Thank you

Regards,  
Bridget
